# Supplementary material for: Nanoscale-Resistive Switching in Forming-Free Zinc Oxide Memristive Structures
Source: MDPI journal article supplement (doi:10.3390/nano12030455), 2022-01-28
Supplement: s1 [file s1]

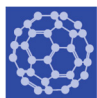

# Nanoscale-Resistive Switching in Forming-Free Zinc Oxide Memristive Structures

Roman V. Tominov <sup>1</sup>, Zakhar E. Vakulov <sup>3</sup>, Nikita V. Polupanov <sup>4</sup>, Aleksandr V. Sanko <sup>1</sup>, Vadim I. Avilov <sup>2</sup>, Oleg A. Ageev <sup>2</sup> and Vladimir A. Smirnov <sup>1,\*</sup>

<sup>1</sup> Department of Radioelectronics and Nanoelectronics, Institute of Nanotechnologies, Electronics and Electronic Equipment Engineering, Southern Federal University, Taganrog 347922, Russia; tominov@sfedu.ru (R.V.T.); avsaenko@sfedu.ru (A.V.S.); vasmirnov@sfedu.ru (V.A.S)

<sup>2</sup> Department of Micro- and Nanoelectronics, Institute of Nanotechnologies, Electronics and Electronic Equipment Engineering, Southern Federal University, Taganrog 347922, Russia; avilovvi@sfedu.ru (V.I.A.); ageev@sfedu.ru (O.A.A.)

<sup>3</sup> Federal Research Centre the Southern Scientific Centre of the Russian Academy of Sciences, Rostov-on-Don 344006, Russia; vakulov@ssc-ras.ru

<sup>4</sup> Laboratory of Functional Nanomaterials Technology, Southern Federal University, Taganrog 347922, Russia; npolupanov@sfedu.ru

\* Correspondence: vasmirnov@sfedu.ru

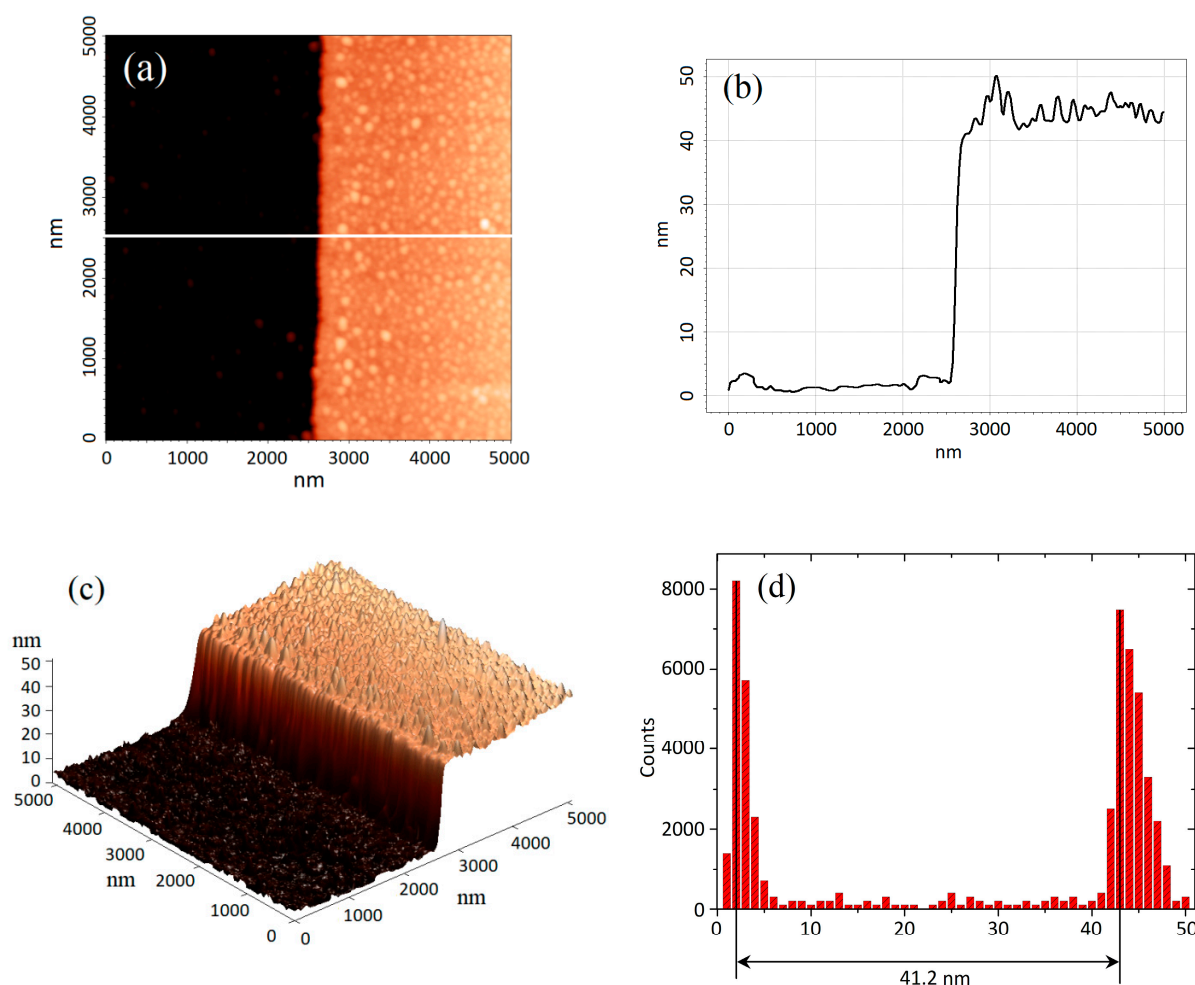

**Figure S1.** Experimental studies of the forming-free nanocrystalline ZnO film thickness: (a) – AFM-image; (b) – AFM cross section along the white line in (a); (c) – 3D AFM-image; (d) – height histogram.

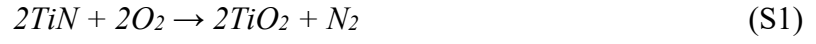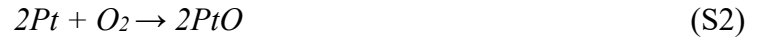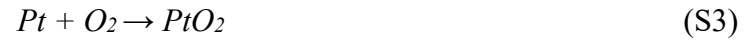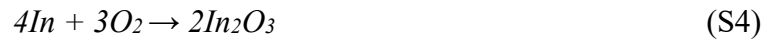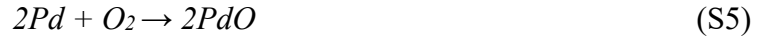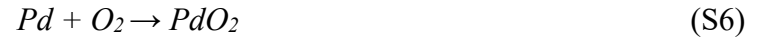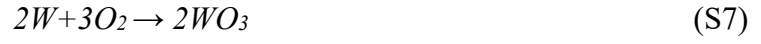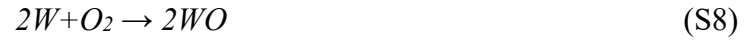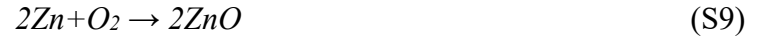

**Equations S1–S9.** Reduction reaction at the interface between the electrode and the forming-free nanocrystalline ZnO film.
